# Supplementary material for: Association between covid-19 vaccination, SARS-CoV-2 infection, and risk of immune mediated neurological events: population based cohort and self-controlled case series analysis
Source: PubMed Central journal article supplement (PMC8924704; doi:10.1136/bmj-2021-068373), 2022-03-16
Supplement: lixi068373.ww.pdf [file lixi068373.ww.pdf]

## SUPPLEMENTARY MATERIALS

**Table 1. Codes used for the definition of study events.**

| <b>Id</b>                      | <b>Code</b>       | <b>Name</b>                                             | <b>Vocabulary</b> |
|--------------------------------|-------------------|---------------------------------------------------------|-------------------|
| <b>Bell's palsy</b>            |                   |                                                         |                   |
| 44784628                       | 87651000119100    | Facial palsy House-Brackmann grade VI                   | SNOMED            |
| 44782796                       | 68151000119106    | Facial palsy House-Brackmann grade V                    | SNOMED            |
| 44782795                       | 68141000119109    | Facial palsy House-Brackmann grade IV                   | SNOMED            |
| 44782794                       | 68131000119100    | Facial palsy House-Brackmann grade III                  | SNOMED            |
| 44782526                       | 68121000119103    | Facial palsy House-Brackmann grade II                   | SNOMED            |
| 42710044                       | 449916008         | Peripheral facial palsy                                 | SNOMED            |
| 37396434                       | 716243005         | Sellars Beighton syndrome                               | SNOMED            |
| 37204553                       | 783257005         | Familial recurrent peripheral facial palsy              | SNOMED            |
| 4091559                        | 280816001         | Facial palsy                                            | SNOMED            |
| 4063208                        | 164110008         | O/E - cranial 7 -paralysis-UMN                          | SNOMED            |
| 4044386                        | 230546006         | Familial facial nerve palsy                             | SNOMED            |
| 4002030                        | 11045000          | Supranuclear facial nerve paralysis                     | SNOMED            |
| 3182576                        | 12870001000004100 | Partial seventh nerve palsy                             | Nebraska Lexicon  |
| 760893                         | 12239661000119100 | Bell's palsy of right side of face                      | SNOMED            |
| 760892                         | 12239621000119100 | Bell's palsy of left side of face                       | SNOMED            |
| 374923                         | 193093009         | Bell's palsy                                            | SNOMED            |
| <b>Transverse myelitis</b>     |                   |                                                         |                   |
| 4047628                        | 230197009         | Acute viral transverse myelitis                         | SNOMED            |
| 4044077                        | 230378004         | Acute non-infective transverse myelitis                 | SNOMED            |
| 4042204                        | 230198004         | Varicella transverse myelitis                           | SNOMED            |
| 443904                         | 16631009          | Transverse myelopathy syndrome                          | SNOMED            |
| 139803                         | 47000000          | Acute transverse myelitis                               | SNOMED            |
| 134330                         | 425756000         | Idiopathic transverse myelitis                          | SNOMED            |
| <b>Guillain-Barré syndrome</b> |                   |                                                         |                   |
| 37396786                       | 716723000         | Acute inflammatory demyelinating polyradiculoneuropathy | SNOMED            |
| 37396785                       | 716722005         | Acute motor sensory axonal neuropathy                   | SNOMED            |
| 37396086                       | 715770009         | Acute motor axonal neuropathy                           | SNOMED            |

|                          |                 |                                                                                               |        |
|--------------------------|-----------------|-----------------------------------------------------------------------------------------------|--------|
| 37204541                 | 783244002       | Acute pure sensory neuropathy                                                                 | SNOMED |
| 37204369                 | 783010003       | Pharyngeal-cervical-brachial variant of Guillain-Barré syndrome                               | SNOMED |
| 35624130                 | 766722008       | Paraparetic variant of Guillain-Barré syndrome                                                | SNOMED |
| 35623634                 | 766049000       | Acute sensory ataxic neuropathy                                                               | SNOMED |
| 4164770                  | 40956001        | Guillain-Barré syndrome                                                                       | SNOMED |
| 4070552                  | 1767005         | Fisher's syndrome                                                                             | SNOMED |
| 374925                   | 129131007       | Acute infective polyneuritis                                                                  | SNOMED |
| <b>Encephalomyelitis</b> |                 |                                                                                               |        |
| 46285143                 | 963741000000101 | Bacterial meningoencephalomyelitis                                                            | SNOMED |
| 43530701                 | 182961000119101 | Acute disseminated encephalomyelitis following infectious disease                             | SNOMED |
| 40480147                 | 443153007       | Toxic encephalomyelitis                                                                       | SNOMED |
| 36715541                 | 721249007       | Infection causing encephalomyelitis                                                           | SNOMED |
| 36676712                 | 773688007       | Chronic lymphocytic inflammation with pontine perivascular enhancement responsive to steroids | SNOMED |
| 35607947                 | 763310000       | Acute necrotizing encephalopathy of childhood                                                 | SNOMED |
| 4330496                  | 431520004       | Inflammation of spinal cord due to toxin                                                      | SNOMED |
| 4320933                  | 70576008        | Enteroviral encephalomyelitis                                                                 | SNOMED |
| 4310021                  | 424761009       | Paraneoplastic encephalomyelitis                                                              | SNOMED |
| 4249574                  | 72986009        | Acute hemorrhagic leukoencephalitis                                                           | SNOMED |
| 4242575                  | 58766009        | Granulomatous meningoencephalomyelitis                                                        | SNOMED |
| 4233538                  | 359686005       | Van Bogaert's sclerosing leukoencephalitis                                                    | SNOMED |
| 4228612                  | 422089004       | Encephalomyelitis associated with AIDS                                                        | SNOMED |
| 4220014                  | 397961002       | Encephalomyelitis caused by lymphocytic choriomeningitis virus                                | SNOMED |
| 4206037                  | 55234004        | Pyogranulomatous meningoencephalomyelitis                                                     | SNOMED |
| 4190307                  | 39367000        | Inflammatory disease of the central nervous system                                            | SNOMED |
| 4176250                  | 50776006        | Allergic encephalomyelitis                                                                    | SNOMED |
| 4147498                  | 267576008       | Encephalitis, myelitis and encephalomyelitis                                                  | SNOMED |
| 4120303                  | 302811004       | Progressive congenital rubella encephalomyelitis                                              | SNOMED |
| 4105201                  | 192724008       | Post mixed vaccination encephalitis                                                           | SNOMED |
| 4105200                  | 192711008       | Post diphtheria vaccination encephalitis                                                      | SNOMED |

|         |                 |                                                    |        |
|---------|-----------------|----------------------------------------------------|--------|
| 4104690 | 192723002       | Post hepatitis B vaccination encephalitis          | SNOMED |
| 4104546 | 29197009        | Meningoencephalomyelitis                           | SNOMED |
| 4103116 | 192721000       | Post influenza vaccination encephalitis            | SNOMED |
| 4103115 | 192719005       | Post mumps vaccination encephalitis                | SNOMED |
| 4103114 | 192718002       | Post polio vaccination encephalitis                | SNOMED |
| 4103113 | 192716003       | Post yellow fever vaccination encephalitis         | SNOMED |
| 4103112 | 192714000       | Post rabies vaccination encephalitis               | SNOMED |
| 4103111 | 192712001       | Post pertussis vaccination encephalitis            | SNOMED |
| 4103110 | 192709004       | Post plague vaccination encephalitis               | SNOMED |
| 4103109 | 192708007       | Post cholera vaccination encephalitis              | SNOMED |
| 4103108 | 192707002       | Post paratyphoid vaccination encephalitis          | SNOMED |
| 4103107 | 192706006       | Post typhoid vaccination encephalitis              | SNOMED |
| 4102199 | 192717007       | Post measles vaccination encephalitis              | SNOMED |
| 4102198 | 192705005       | Post BCG vaccination encephalitis                  | SNOMED |
| 4100112 | 192722007       | Post hepatitis A vaccination encephalitis          | SNOMED |
| 4100111 | 192720004       | Post rubella vaccination encephalitis              | SNOMED |
| 4100110 | 192715004       | Post typhus vaccination encephalitis               | SNOMED |
| 4100109 | 192713006       | Post smallpox vaccination encephalitis             | SNOMED |
| 4100108 | 192710009       | Post tetanus vaccination encephalitis              | SNOMED |
| 4098889 | 27040004        | Experimental allergic encephalomyelitis            | SNOMED |
| 4042202 | 230188005       | Post-influenza encephalitis                        | SNOMED |
| 4035637 | 15316002        | Simian B encephalomyelitis                         | SNOMED |
| 3655306 | 860842004       | Encephalomyelitis caused by Coxiella burnetii      | SNOMED |
| 3655305 | 860841006       | Encephalomyelitis caused by bacterium              | SNOMED |
| 3655275 | 860805006       | Encephalomyelitis caused by Neisseria meningitidis | SNOMED |
| 3654623 | 838315004       | Encephalomyelitis caused by Burkholderia           | SNOMED |
| 765827  | 432451000124103 | Multiphasic acute disseminated encephalomyelitis   | SNOMED |
| 761989  | 2701000124105   | Recurrent acute disseminated encephalomyelitis     | SNOMED |
| 443802  | 31367003        | Postvaccinal encephalomyelitis                     | SNOMED |
| 380322  | 186509002       | Post Varicella encephalitis                        | SNOMED |
| 379798  | 230199007       | Post-infectious encephalomyelitis                  | SNOMED |

|        |           |                                      |        |
|--------|-----------|--------------------------------------|--------|
| 379792 | 192704009 | Post-immunization encephalitis       | SNOMED |
| 378143 | 45170000  | Encephalitis                         | SNOMED |
| 377487 | 111872008 | Post measles encephalitis            | SNOMED |
| 375185 | 128191000 | Rubella encephalomyelitis            | SNOMED |
| 374021 | 83942000  | Acute disseminated encephalomyelitis | SNOMED |
| 373189 | 62950007  | Encephalomyelitis                    | SNOMED |
| 372615 | 192727001 | Post-infectious encephalitis         | SNOMED |
| 138965 | 41370002  | Myelitis                             | SNOMED |

SNOMED: Systematized Nomenclature of Medicine

**Table 2. Codes used for the definition of comorbidities and medication use.**

| <b>Id</b> | <b>Code</b> | <b>Name</b>                                | <b>Vocabulary</b> |
|-----------|-------------|--------------------------------------------|-------------------|
| 434621    | 85828009    | Autoimmune disease                         | SNOMED            |
| 443392    | 363346000   | Malignant neoplastic disease               | SNOMED            |
| 201820    | 73211009    | Diabetes mellitus                          | SNOMED            |
| 433736    | 414916001   | Obesity                                    | SNOMED            |
| 321588    | 56265001    | Heart disease                              | SNOMED            |
| 316866    | 38341003    | Hypertensive disorder                      | SNOMED            |
| 4030518   | 236423003   | Renal impairment                           | SNOMED            |
| 21602722  | H02         | Corticosteroids for systemic use           | ATC               |
| 21600961  | B01A        | Antithrombotic agents                      | ATC               |
| 21601853  | C10         | Lipid modifying agents                     | ATC               |
| 21601386  | L           | Antineoplastic and immunomodulating agents | ATC               |

SNOMED: Systematized Nomenclature of Medicine; ATC: Anatomical Therapeutic Chemical

**Table 3. Medical codes used for the definition of compatible COVID-19 clinical code**

| <b>Id</b> | <b>Code</b>      | <b>Name</b>                                                           | <b>Vocabulary</b> |
|-----------|------------------|-----------------------------------------------------------------------|-------------------|
| 45763724  | 700217006        | Suspected coronavirus infection                                       | SNOMED            |
| 44810277  | 878151000000108  | Suspected coronavirus infection                                       | SNOMED            |
| 44797466  | 431711000000107  | [X]Coronavirus infection, unspecified                                 | SNOMED            |
| 40479642  | 441590008        | Pneumonia due to Severe acute respiratory syndrome coronavirus        | SNOMED            |
| 40380828  | 187587009        | Coronavirus as the cause of diseases classified to other chapters     | SNOMED            |
| 37396171  | 715882005        | Severe acute respiratory syndrome of upper respiratory tract          | SNOMED            |
| 37311061  | 840539006        | Disease caused by 2019-nCoV                                           | SNOMED            |
| 37311060  | 840544004        | Suspected disease caused by 2019-nCoV                                 | SNOMED            |
| 37310287  | 1240531000000103 | Myocarditis caused by 2019 novel coronavirus                          | SNOMED            |
| 37310286  | 1240541000000107 | Infection of upper respiratory tract caused by 2019 novel coronavirus | SNOMED            |
| 37310284  | 1240561000000108 | Encephalopathy caused by 2019 novel coronavirus                       | SNOMED            |
| 37310283  | 1240571000000101 | Gastroenteritis caused by 2019 novel coronavirus                      | SNOMED            |
| 37310269  | 1240751000000100 | Disease caused by 2019 novel coronavirus                              | SNOMED            |
| 37310268  | 1240761000000102 | Suspected disease caused by 2019 novel coronavirus                    | SNOMED            |
| 37310254  | 1240521000000100 | Otitis media caused by 2019 novel coronavirus                         | SNOMED            |
| 37016927  | 713084008        | Pneumonia caused by Human coronavirus                                 | SNOMED            |
| 4100065   | 27619001         | Disease due to Coronaviridae                                          | SNOMED            |
| 4092694   | 186758000        | Coronavirus as the cause of diseases classified to other chapters     | SNOMED            |
| 703441    | 1300721000000109 | COVID-19 confirmed by laboratory test                                 | SNOMED            |
| 703440    | 1300731000000106 | Probable COVID-19 confirmed using clinical diagnostic criteria        | SNOMED            |
| 439676    | 186747009        | Coronavirus infection                                                 | SNOMED            |
| 320651    | 398447004        | Severe acute respiratory syndrome                                     | SNOMED            |

SNOMED: Systematized Nomenclature of Medicine

**Table 4. Power calculation for the the self-controlled case series (SCCS)**

|                               | CPRD AURUM              |            |        |      | SIDIAP                  |            |        |       |
|-------------------------------|-------------------------|------------|--------|------|-------------------------|------------|--------|-------|
|                               | Proportion time exposed | Total time | Events | MDRR | Proportion time exposed | Total time | Events | MDRR  |
| <b>ChAdOx1 first-dose</b>     |                         |            |        |      |                         |            |        |       |
| Bell's palsy                  | 0.015                   | 44230222   | 7403   | 1.29 | 0.0135                  | 9086299    | 1925   | 1.62  |
| Encephalomyelitis             | 0.0143                  | 43035252   | 415    | 2.51 | 0.0145                  | 8068323    | 111    | 4.31  |
| Guillain Barre syndrome       | 0.0167                  | 40030856   | 477    | 2.27 | 0.0136                  | 9005332    | 101    | 4.67  |
| Transverse myelitis           | 0.0142                  | 59366705   | 304    | 2.85 | 0.0135                  | 9045039    | 9      | 24.69 |
| <b>BNT162b2 first-dose</b>    |                         |            |        |      |                         |            |        |       |
| Bell's palsy                  | 0.012                   | 30195714   | 4564   | 1.42 | 0.0134                  | 31723854   | 7386   | 1.30  |
| Encephalomyelitis             | 0.0121                  | 23621329   | 260    | 3.25 | 0.0145                  | 27732788   | 489    | 2.31  |
| Guillain Barre syndrome       | 0.0125                  | 28983007   | 313    | 2.96 | 0.0134                  | 31797412   | 305    | 2.82  |
| Transverse myelitis           | 0.0114                  | 33884636   | 176    | 4.04 | 0.0128                  | 33399967   | 50     | 7.22  |
| <b>mRNA-1723 first-dose</b>   |                         |            |        |      |                         |            |        |       |
| Bell's palsy                  |                         |            |        |      | 0.0131                  | 4684571    | 978    | 1.92  |
| Encephalomyelitis             |                         |            |        |      | 0.014                   | 4275406    | 151    | 3.76  |
| Guillain Barre syndrome       |                         |            |        |      | 0.0132                  | 4664538    | 71     | 5.75  |
| Transverse myelitis           |                         |            |        |      | 0.0133                  | 4642457    | 51     | 6.98  |
| <b>Ad26.COV2.S first-dose</b> |                         |            |        |      |                         |            |        |       |
| Bell's palsy                  |                         |            |        |      | 0.0107                  | 1922746    | 454    | 2.63  |
| Encephalomyelitis             |                         |            |        |      | 0.0116                  | 1727694    | 22     | 13.34 |
| Guillain Barre syndrome       |                         |            |        |      | 0.0107                  | 1910933    | 18     | 16.33 |

|                                               |        |          |      |       |        |         |      |       |
|-----------------------------------------------|--------|----------|------|-------|--------|---------|------|-------|
| Transverse myelitis                           |        |          |      |       | 0.0107 | 1917374 | <5   |       |
| <b>SARS-CoV-2 infection (21 days at risk)</b> |        |          |      |       |        |         |      |       |
| Bell's palsy                                  | 0.0046 | 10037690 | 2335 | 2.05  | 0.0135 | 4329031 | 1090 | 1.85  |
| Encephalomyelitis                             | 0.0049 | 9498944  | 127  | 7.90  | 0.0141 | 3954950 | 101  | 4.578 |
| Guillain Barre syndrome                       | 0.0046 | 9289326  | 147  | 7.43  | 0.0135 | 4328106 | 46   | 7.36  |
| Transverse myelitis                           | 0.0045 | 12357608 | 85   | 10.89 | 0.0134 | 4358694 | 6    | 35.99 |
| <b>SARS-CoV-2 infection (90 days at risk)</b> |        |          |      |       |        |         |      |       |
| Bell's palsy                                  | 0.0046 | 10037690 | 2335 | 2.05  | 0.0135 | 4329031 | 1090 | 1.85  |
| Encephalomyelitis                             | 0.0049 | 9498944  | 127  | 7.90  | 0.0141 | 3954950 | 101  | 4.58  |
| Guillain Barre syndrome                       | 0.0046 | 9289326  | 147  | 7.43  | 0.0135 | 4328106 | 46   | 7.36  |
| Transverse myelitis                           | 0.0045 | 12357608 | 85   | 10.89 | 0.0134 | 4358694 | 6    | 35.99 |

CPRD: Clinical Practice Research Datalink; SIDIAP: Information System for Research in Primary Care; MDRR: minimum detectable relative risks.





|                         |  |  |  |  |        |         |     |       |
|-------------------------|--|--|--|--|--------|---------|-----|-------|
| Bell's palsy            |  |  |  |  | 0.0107 | 1696564 | 396 | 2.77  |
| Encephalomyelitis       |  |  |  |  | 0.0116 | 1523541 | 19  | 14.86 |
| Guillain Barre syndrome |  |  |  |  | 0.0108 | 1686084 | 13  | 21.10 |
| Transverse myelitis     |  |  |  |  | 0.0107 | 1692484 | <5  |       |

CPRD: Clinical Practice Research Datalink; SIDIAP: Information System for Research in Primary Care; MDRR: minimum detectable relative risks.

**Table 6A. Sensitivity analyses for the historical comparison analyses in the Clinical Practice Research Datalink (CPRD AURUM)**

|                                                                                                 | N         | Person-years | Observed events | Expected events | SIR (95% CI)        |
|-------------------------------------------------------------------------------------------------|-----------|--------------|-----------------|-----------------|---------------------|
| <b>Results reducing time at risk to 21 days among persons in the SARS-CoV-2-infected cohort</b> |           |              |                 |                 |                     |
| Bell's Palsy                                                                                    | 446,851   | 25,54        | 15              | 9.6             | 1.57 (0.95 to 2.60) |
| Encephalomyelitis                                                                               | 447,037   | 25,551       | <5              | 0.4             |                     |
| Guillain Barré Syndrome                                                                         | 447,029   | 25,551       | <5              | 0.6             |                     |
| <b>Results excluding vaccinated persons with a history of COVID-19</b>                          |           |              |                 |                 |                     |
| Bell's Palsy                                                                                    |           |              |                 |                 |                     |
| ChAdOx1 first-dose                                                                              | 3,522,487 | 361,239      | 108             | 155.0           | 0.70 (0.58 to 0.84) |
| ChAdOx1 second-dose                                                                             | 1,029,876 | 206,264      | 24              | 89.5            | 0.27 (0.18 to 0.40) |
| BNT162b2 first-dose                                                                             | 1,599,332 | 261,317      | 43              | 110.7           | 0.39 (0.29 to 0.52) |
| BNT162b2 second-dose                                                                            | 1,099,149 | 221,961      | 22              | 94.0            | 0.23 (0.15 to 0.36) |
| Encephalomyelitis                                                                               |           |              |                 |                 |                     |
| ChAdOx1 first-dose                                                                              | 3,523,932 | 361,399      | 9               | 7.2             | 1.25 (0.65 to 2.41) |
| BNT162b2 first-dose                                                                             | 1,599,992 | 261,429      | <5              | 2.0             |                     |
| BNT162b2 second-dose                                                                            | 1,099,577 | 222,051      | <5              | 1.0             |                     |
| Guillain Barré Syndrome                                                                         |           |              |                 |                 |                     |
| ChAdOx1 first-dose                                                                              | 3,523,992 | 361,405      | 11              | 14.1            | 0.78 (0.43 to 1.41) |
| ChAdOx1 second-dose                                                                             | 1,030,356 | 206,365      | <5              | 9.0             |                     |
| BNT162b2 first-dose                                                                             | 1,600,002 | 261,43       | <5              | 9.9             |                     |

|                                                        |           |         |     |       |                      |
|--------------------------------------------------------|-----------|---------|-----|-------|----------------------|
| BNT162b2 second-dose                                   | 1,099,583 | 222,052 | <5  | 8.5   |                      |
| Transverse Myelitis                                    |           |         |     |       |                      |
| ChAdOx1 first-dose                                     | 3,523,987 | 361,407 | <5  | 7.2   |                      |
| BNT162b2 first-dose                                    | 1,600,021 | 261,434 | <5  | 4.5   |                      |
| <b>Results without requiring year of prior history</b> |           |         |     |       |                      |
| Bell's Palsy                                           |           |         |     |       |                      |
| ChAdOx1 first-dose                                     | 4,045,751 | 409,047 | 124 | 174.2 | 0.71 (0.60 to 0.85)  |
| ChAdOx1 second-dose                                    | 1,148,737 | 229,423 | 27  | 99.0  | 0.27 (0.19 to 0.40)  |
| BNT162b2 first-dose                                    | 1,805,347 | 292,343 | 49  | 122.8 | 0.40 (0.30 to 0.53)  |
| BNT162b2 second-dose                                   | 1,226,529 | 247,211 | 24  | 103.9 | 0.23 (0.15 to 0.34)  |
| SARS-CoV-2 positive test                               | 491,257   | 116,681 | 57  | 43.0  | 1.33 (1.02 to 1.72)  |
| Encephalomyelitis                                      |           |         |     |       |                      |
| ChAdOx1 first-dose                                     | 4,047,348 | 409,22  | 13  | 8.1   | 1.60 (0.93 to 2.76)  |
| BNT162b2 first-dose                                    | 1,806,088 | 292,465 | <5  |       |                      |
| BNT162b2 second-dose                                   | 1,226,997 | 247,31  | <5  |       |                      |
| SARS-CoV-2 positive test                               | 491,453   | 116,733 | 11  | 1.7   | 6.35 (3.52 to 11.47) |
| Guillain Barré Syndrome                                |           |         |     |       |                      |
| ChAdOx1 first-dose                                     | 4,047,416 | 409,228 | 12  | 15.5  | 0.77 (0.44 to 1.36)  |
| BNT162b2 first-dose                                    | 1,806,095 | 292,466 | <5  |       |                      |
| BNT162b2 second-dose                                   | 1,227,001 | 247,31  | <5  |       |                      |
| SARS-CoV-2 positive test                               | 491,447   | 116,732 | 11  | 2.7   | 4.01 (2.22 to 7.24)  |

|                          |           |         |    |  |  |
|--------------------------|-----------|---------|----|--|--|
| Transverse Myelitis      |           |         |    |  |  |
| ChAdOx1 first-dose       | 4,047,425 | 409,231 | <5 |  |  |
| BNT162b2 first-dose      | 1,806,120 | 292,47  | <5 |  |  |
| SARS-CoV-2 positive test | 491,459   | 116,735 | <5 |  |  |

**Table 6B. Sensitivity analyses for the historical comparison analyses in the Information System for Research in Primary Care (SIDIAP)**

|                                                                                                 | N         | Person-years | Observed events | Expected events | SIR (95% CI)          |
|-------------------------------------------------------------------------------------------------|-----------|--------------|-----------------|-----------------|-----------------------|
| <b>Results reducing time at risk to 21 days among persons in the SARS-CoV-2-infected cohort</b> |           |              |                 |                 |                       |
| Bell's Palsy                                                                                    | 288,03    | 16,39        | 36              | 13.5            | 2.66 (1.92 to 3.69)   |
| Encephalomyelitis                                                                               | 288,374   | 16,411       | 10              | 1.1             | 8.84 (4.76 to 16.43)  |
| Guillain Barré Syndrome                                                                         | 288,392   | 16,412       | 8               | 0.7             | 11.33 (5.66 to 22.65) |
| <b>Results excluding vaccinated persons with a history of COVID-19</b>                          |           |              |                 |                 |                       |
| Bell's Palsy                                                                                    |           |              |                 |                 |                       |
| ChAdOx1 first-dose                                                                              | 556,581   | 85,327       | 23              | 79.2            | 0.29 (0.19 to 0.44)   |
| ChAdOx1 second-dose                                                                             | 223,631   | 53,893       | 10              | 45.9            | 0.22 (0.12 to 0.41)   |
| BNT162b2 first-dose                                                                             | 1,718,765 | 93,23        | 85              | 106.4           | 0.80 (0.65 to 0.99)   |
| BNT162b2 second-dose                                                                            | 1,143,065 | 67,988       | 78              | 88.7            | 0.88 (0.70 to 1.10)   |
| mRNA-1723 first-dose                                                                            | 219,459   | 15,971       | 12              | 13.9            | 0.87 (0.49 to 1.52)   |
| mRNA-1723 second-dose                                                                           | 147,538   | 11,573       | <5              |                 |                       |
| Ad26.COVS.S first-dose                                                                          | 108,031   | 4,692        | 5               | 4.7             | 1.06 (0.44 to 2.56)   |
| Encephalomyelitis                                                                               |           |              |                 |                 |                       |
| ChAdOx1 first-dose                                                                              | 557,017   | 85,389       | 5               | 5.8             | 0.86 (0.36 to 2.06)   |
| ChAdOx1 second-dose                                                                             | 223,777   | 53,929       | <5              | 3.3             |                       |
| BNT162b2 first-dose                                                                             | 1,720,466 | 93,33        | 7               | 10.6            | 0.66 (0.31 to 1.38)   |
| BNT162b2 second-dose                                                                            | 1,144,394 | 68,071       | <5              | 9.4             |                       |

|                                                        |           |         |     |       |                     |
|--------------------------------------------------------|-----------|---------|-----|-------|---------------------|
| mRNA-1723 first-dose                                   | 219,706   | 15,99   | <5  | 1.1   |                     |
| Ad26.COVS.S first-dose                                 | 108,13    | 4,696   | <5  | 0.4   |                     |
| Guillain Barré Syndrome                                |           |         |     |       |                     |
| ChAdOx1 first-dose                                     | 557,037   | 85,392  | <5  | 4.8   |                     |
| BNT162b2 first-dose                                    | 1,720,473 | 93,33   | 5   | 5.8   | 0.87 (0.36 to 2.09) |
| BNT162b2 second-dose                                   | 1,144,392 | 68,071  | <5  | 4.9   |                     |
| mRNA-1723 second-dose                                  | 147,734   | 11,589  | <5  | 0.6   |                     |
| Transverse Myelitis                                    |           |         |     |       |                     |
| BNT162b2 first-dose                                    | 1,720,543 | 93,334  | <5  | 0.9   |                     |
| <b>Results without requiring year of prior history</b> |           |         |     |       |                     |
| Bell's Palsy                                           |           |         |     |       |                     |
| ChAdOx1 first-dose                                     | 594,588   | 89,329  | 27  | 82.7  | 0.33 (0.22 to 0.48) |
| ChAdOx1 second-dose                                    | 231,228   | 55,786  | 10  | 47.3  | 0.21 (0.11 to 0.39) |
| BNT162b2 first-dose                                    | 1,900,497 | 103,128 | 100 | 117.1 | 0.85 (0.70 to 1.04) |
| BNT162b2 second-dose                                   | 1,256,600 | 74,934  | 85  | 97.4  | 0.87 (0.71 to 1.08) |
| mRNA-1723 first-dose                                   | 245,672   | 17,731  | 14  | 15.3  | 0.92 (0.54 to 1.55) |
| mRNA-1723 second-dose                                  | 160,667   | 12,615  | 5   | 11.4  | 0.44 (0.18 to 1.06) |
| Ad26.COVS.S first-dose                                 | 122,497   | 5,319   | 6   | 5.3   | 1.14 (0.51 to 2.53) |
| SARS-CoV-2 positive test                               | 289,417   | 66,921  | 93  | 54.9  | 1.69 (1.38 to 2.07) |
| Encephalomyelitis                                      |           |         |     |       |                     |
| ChAdOx1 first-dose                                     | 595,068   | 89,396  | 5   | 6.1   | 0.82 (0.34 to 1.97) |

|                          |           |         |    |      |                     |
|--------------------------|-----------|---------|----|------|---------------------|
| BNT162b2 first-dose      | 1,902,480 | 103,244 | 9  | 11.7 | 0.77 (0.40 to 1.48) |
| BNT162b2 second-dose     | 1,258,126 | 75,03   | 4  | 10.3 | 0.39 (0.15 to 1.03) |
| mRNA-1723 first-dose     | 245,949   | 17,752  | <5 | 1.2  |                     |
| Ad26.COVS.S first-dose   | 122,615   | 5,324   | <5 | 0.4  |                     |
| SARS-CoV-2 positive test | 289,761   | 67,006  | 17 | 4.5  | 3.75 (2.33 to 6.04) |
| Guillain Barré Syndrome  |           |         |    |      |                     |
| ChAdOx1 first-dose       | 595,085   | 89,397  | <5 | 5.0  |                     |
| BNT162b2 first-dose      | 1,902,494 | 103,245 | 5  | 6.3  | 0.79 (0.33 to 1.90) |
| BNT162b2 second-dose     | 1,258,125 | 75,03   | <5 | 5.4  |                     |
| mRNA-1723 second-dose    | 160,885   | 12,633  | <5 | 0.7  |                     |
| SARS-CoV-2 positive test | 289,78    | 67,011  | 17 | 2.9  | 5.93 (3.69 to 9.54) |
| Transverse Myelitis      |           |         |    |      |                     |
| BNT162b2 first-dose      | 1,902,581 | 103,25  | <5 | 1.0  |                     |
| mRNA-1723 second-dose    | 160,894   | 12,634  | <5 | 0.1  |                     |



**Table 7. Sensitivity analyses for the self-controlled case series (SCCS) excluding individuals infected with SARS-CoV-2 prior to vaccination. Incidence rate ratios (95% confidence intervals) for COVID-19 vaccination or infection and the occurrence of Bell's Palsy.**

|                             | CPRD AURUM       |                        |                  |                        | SIDIAP           |                        |                  |                        |                  |                        |
|-----------------------------|------------------|------------------------|------------------|------------------------|------------------|------------------------|------------------|------------------------|------------------|------------------------|
|                             | ChAdOx1          |                        | BNT162b2         |                        | ChAdOx1          |                        | BNT162b2         |                        | mRNA-1273        |                        |
|                             | Number of events | IRR                    | Number of events | IRR                    | Number of events | IRR                    | Number of events | IRR                    | Number of events | IRR                    |
| Baseline                    | 6935             | Ref                    | 4375             | Ref                    | 4455             | Ref                    | 8438             | Ref                    | 3695             | Ref                    |
| -21 to -1 days pre-exposure | 74               | 0.66<br>(0.52 to 0.83) | 39               | 0.76<br>(0.54 to 1.03) | 11               | 0.44<br>(0.23 to 0.75) | 64               | 0.67<br>(0.52 to 0.85) | 11               | 0.91<br>(0.47 to 1.56) |
| Day 0                       | 5                | 0.91<br>(0.32 to 1.95) | <5               |                        | <5               |                        | <5               |                        | <5               |                        |
| Days 1 - 7 post exposure    | 24               | 0.61<br>(0.40 to 0.89) | 13               | 0.75<br>(0.41 to 1.23) | 5                | 0.60<br>(0.21 to 1.29) | 20               | 0.63<br>(0.39 to 0.95) | <5               |                        |
| Day 8 - 14 post exposure    | 31               | 0.80<br>(0.55 to 1.12) | 16               | 0.92<br>(0.54 to 1.45) | 5                | 0.60<br>(0.22 to 1.30) | 27               | 0.88<br>(0.59 to 1.26) | <5               |                        |
| Days 15 - 21 post exposure  | 40               | 1.05<br>(0.75 to 1.41) | 15               | 0.85<br>(0.48 to 1.36) | 11               | 1.33<br>(0.69 to 2.29) | 22               | 0.78<br>(0.50 to 1.16) | <5               |                        |
| Days 1- 21 post exposure    | 95               | 0.82<br>(0.66 to 1.00) | 44               | 0.84<br>(0.61 to 1.12) | 21               | 0.84<br>(0.53 to 1.26) | 69               | 0.76<br>(0.60 to 0.96) | *                | 0.95<br>(0.49 to 1.63) |

CPRD: Clinical Practice Research Datalink; SIDIAP: Information System for Research in Primary Care. Events with less than 5 occurrences have been omitted for privacy reasons.

**Table 8. Cases of immune-mediated neurological events with hospitalisation in SIDIAP between 1 January 2017 to 30 June 2021**

|                         | <b>Number of cases</b> | <b>Cases with hospitalisation (Day 0) (row %)</b> | <b>Cases with hospitalisation (Day 0 to Day 3) (row %)</b> |
|-------------------------|------------------------|---------------------------------------------------|------------------------------------------------------------|
| Bell's palsy            | 19,938                 | 6,687 (33.5 %)                                    | 7,166 (35.9 %)                                             |
| Encephalomyelitis       | 1,603                  | 1,295 (80.8 %)                                    | 1,384 (86.3%)                                              |
| Guillain Barre syndrome | 1,018                  | 704 (69.2 %)                                      | 801 (78.7%)                                                |
| Transverse myelitis     | 193                    | 106 (54.9 %)                                      | 114 (59.1%)                                                |

SIDIAP: Information System for Research in Primary Care

**Table 9. Cases of death following immune-mediated neurological events between 1 January 2017 to 30 June 2021**

|                         | <b>Number of cases</b> | <b>Cases of death<br/>(Day 0 to Day 7) (row %)</b> |
|-------------------------|------------------------|----------------------------------------------------|
| <b>CPRD AURUM</b>       |                        |                                                    |
| Bell's palsy            | 107,652                | 45 (0.4%)                                          |
| Encephalomyelitis       | 9,253                  | 32 (0.3%)                                          |
| Guillain Barre syndrome | 7,474                  | 20 (0.3%)                                          |
| Transverse myelitis     | 4,465                  | <5                                                 |
| <b>SIDIAP</b>           |                        |                                                    |
| Bell's palsy            | 19,938                 | 53 (0.3%)                                          |
| Encephalomyelitis       | 1,603                  | 6 (0.4%)                                           |
| Guillain Barre syndrome | 1,018                  | <5                                                 |
| Transverse myelitis     | 193                    | 0                                                  |

CPRD: Clinical Practice Research Datalink; SIDIAP: Information System for Research in Primary Care. These counts were calculated by taking all persons who experienced any of the studied immune-mediated neurological disorders from 1 January 2017 to end of data availability in the two databases.

**Figure 1A. Time between end of study or censor date and occurrence of Bell's palsy from 1 January 2017 to end of data availability in CPRD AURUM**

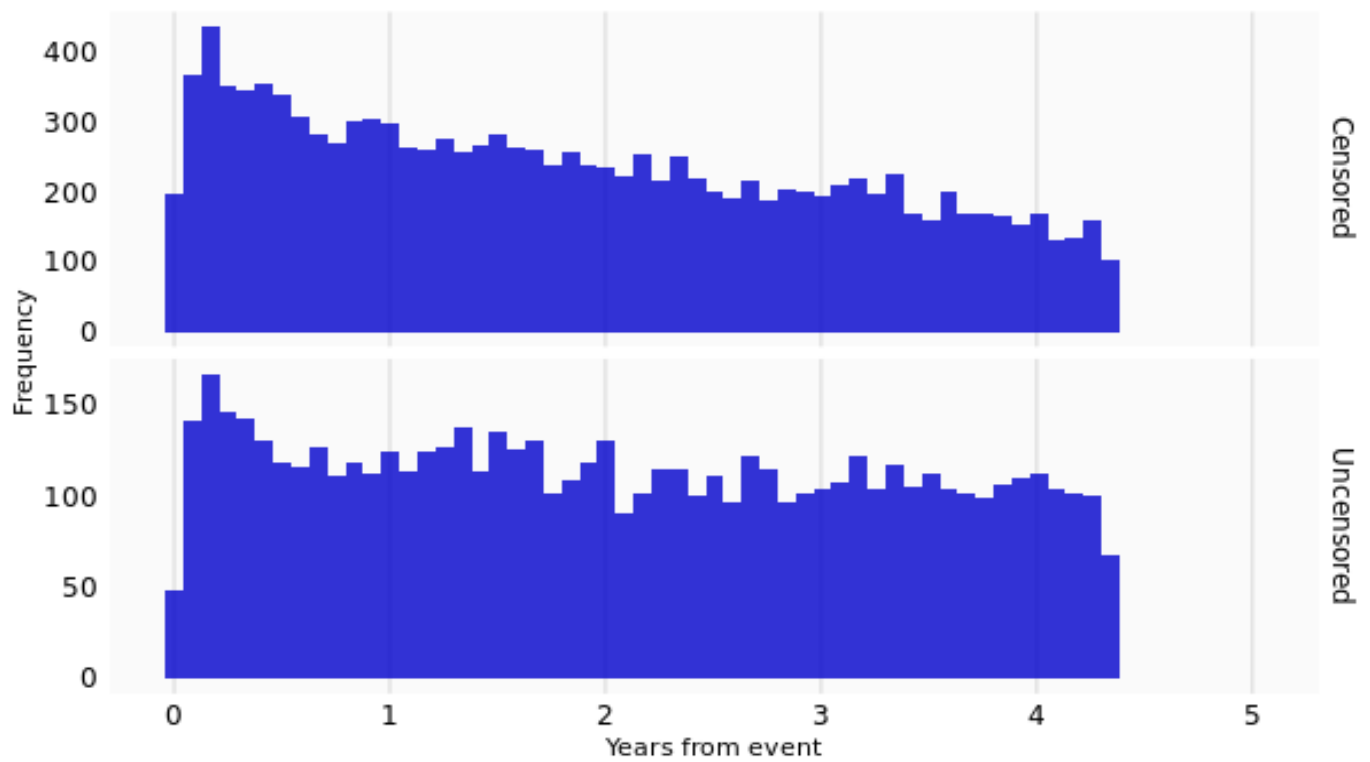

CPRD: Clinical Practice Research Datalink

**Figure 1B. Time between end of study or censor date and occurrence of Bell's palsy from 1 January 2017 to end of data availability in SIDIAP**

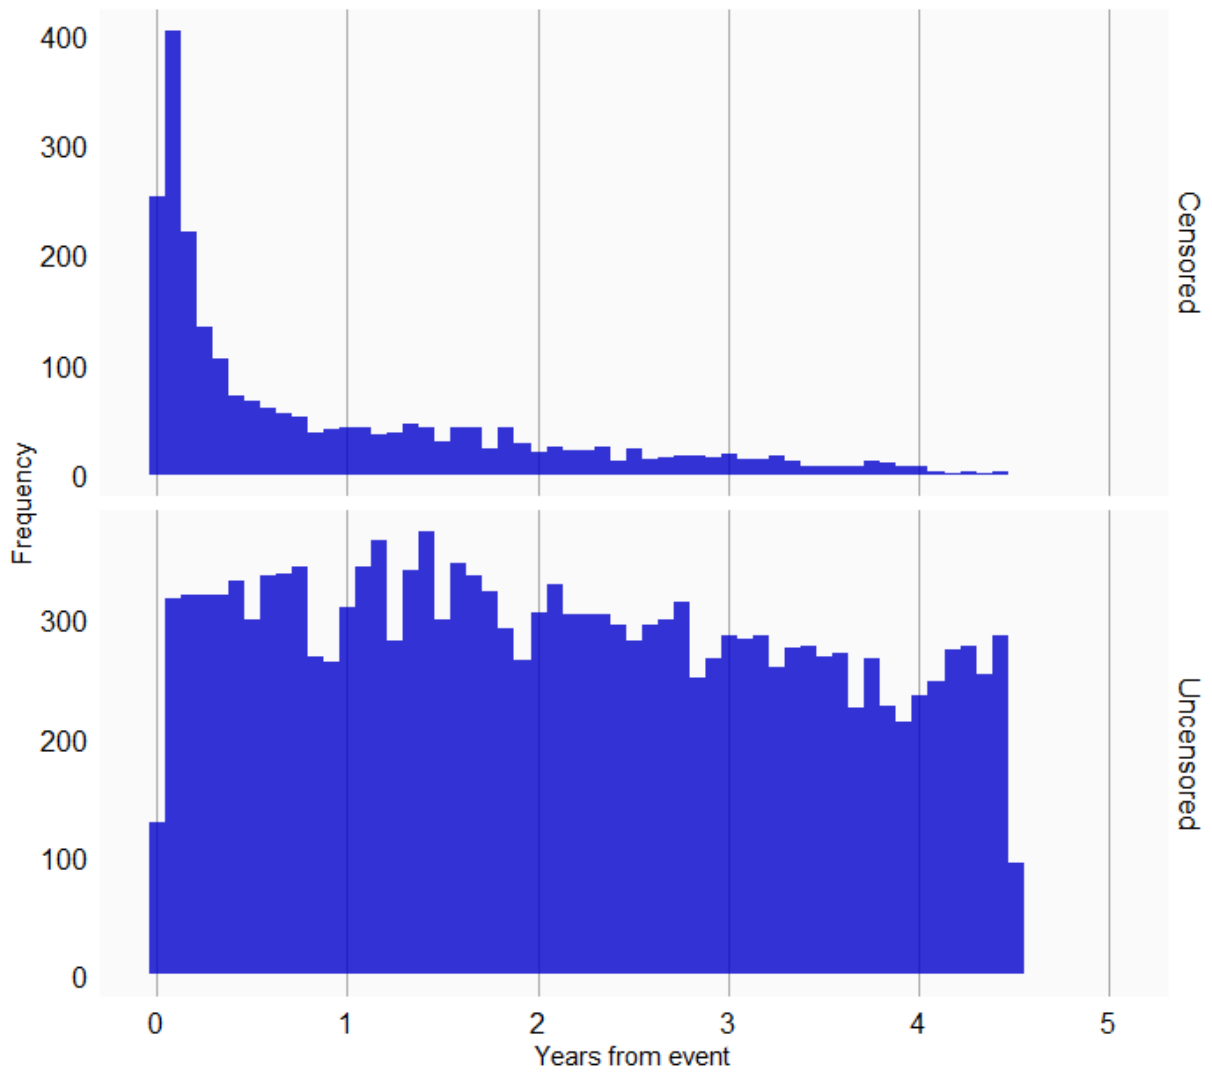

SIDIAP: Information System for Research in Primary Care

**Figure 2. Incidence Rate Ratios (IRR) by age group and sex**

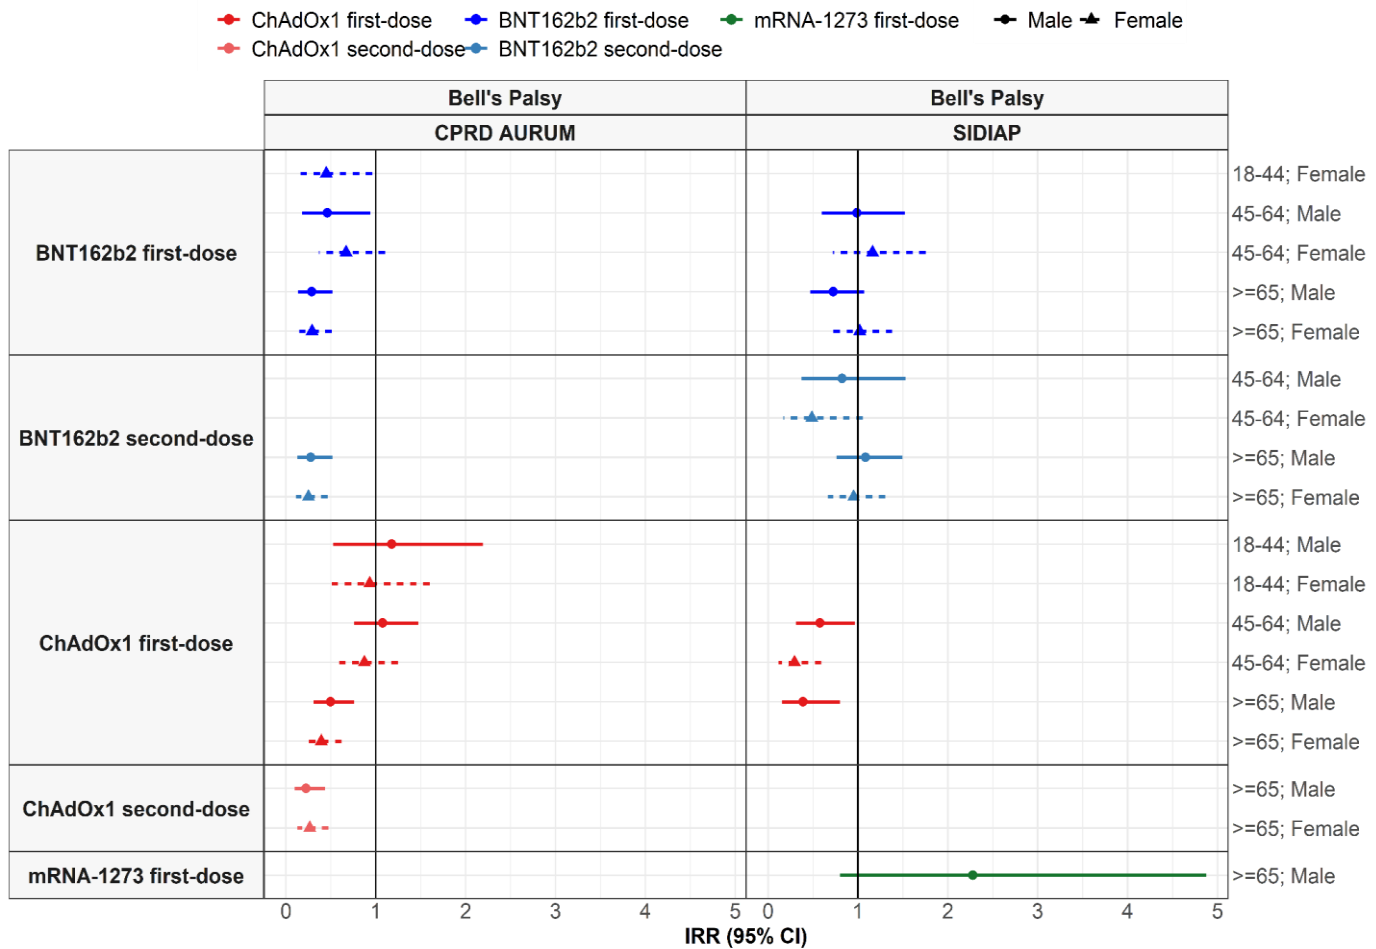

CPRD: Clinical Practice Research Datalink; SIDIAP: Information System for Research in Primary Care. Events with less than 5 occurrences have been omitted for privacy reasons. No events were observed for the omitted cohorts
